# Supplementary material
Source: PubMed Central journal article supplement (PMC3142937)
Supplement: NIHMS308716-supplement-supplement_1.pdf [file NIHMS308716-supplement-supplement_1.pdf]

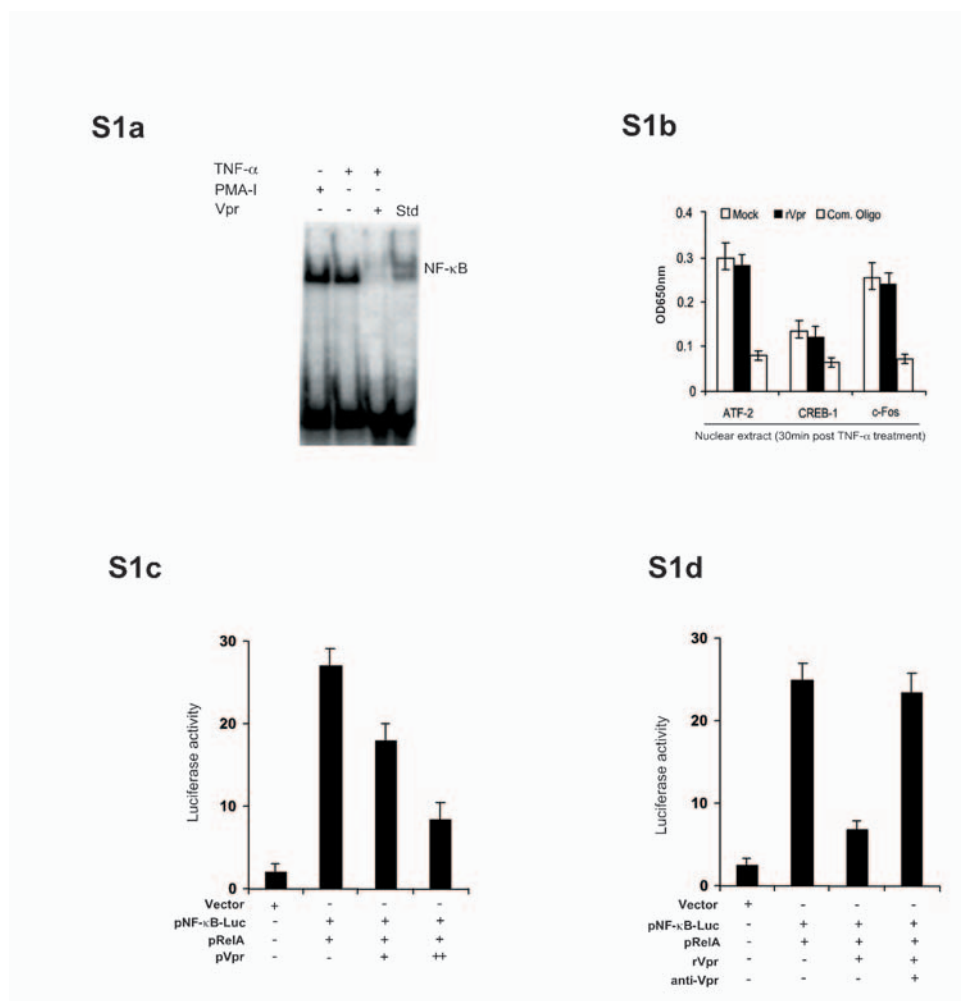

**Figure S1** Vpr specifically inhibits NF- $\kappa$ B transcriptional activation. (a) DNA binding effects of NF- $\kappa$ B in cells treated with rVpr. Cell nuclear extracts were prepared from the rVpr treated cells incubated with or without TNF- $\alpha$  (5ng/ml) for 3 hrs and incubated with a oligonucleotide radiolabelled probe corresponding to the consensus-binding site for NF- $\kappa$ B as described in Methods. Their respective DNA binding activity in the presence and absence of Vpr was determined. PMA-I stimulated cells were also loaded as an additional control for NF- $\kappa$ B activity. (b) HeLa cells were treated with 5ng/ml TNF- $\alpha$  as indicated time period in the presence or absence of rVpr (10pg). Cells were collected as indicated time period and nuclear proteins were extracted for ELISA-based transcription factor assay. Nuclear extracts (10 $\mu$ g)

were incubated in 96-well plates lined with oligonucleotide specific for ATF-2, CREB-1 and c-Fos. Absorbance (O.D) was measured at 650nm. The assay was performed in triplicate. Values and bars represents mean (n=3) and SD. (c-d) Vpr mediated repression of RelA. (c) CV-1 cells were transfected with the NF- $\kappa$ B dependent reporter plasmid (2 $\mu$ g), with pRelA plasmid (1 $\mu$ g), and with pCMVLacZ (1 $\mu$ g) with or without Vpr plasmid at different concentrations (2 $\mu$ g and 4 $\mu$ g). (d) In control antibody experiments, rVpr (10pg) was also added and cotreated with an anti-Vpr antibody and Luciferase activity was measured thereafter using a reporter assay system, and chemiluminescent activity was measured as described in Methods.

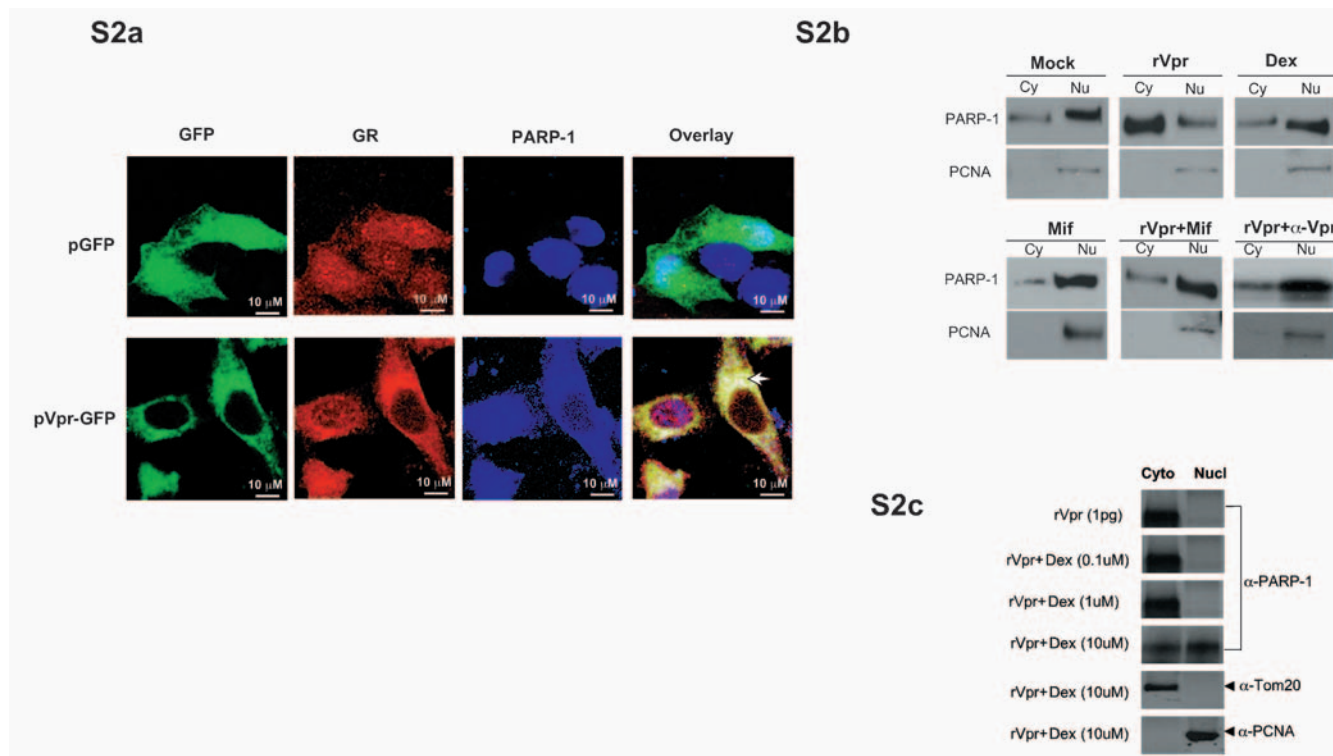

**Figure S2** Dexamethasone can antagonize Vpr's effect on PARP-1 localization. (a) Vpr, GR and PARP-1 colocalize to cytoplasmic and peri-nuclear regions. Immunofluorescence analysis of HeLa cells that were transiently transfected with GFP vector or pVpr-GFP (2µg). At 36h post-transfection, transfected cells were fixed and immunostained with anti-GR and anti-PARP-1 antibody as described in Methods. Arrow indicates the colocalization of all three proteins. (b) Dexamethasone is insufficient to regulate the localization of PARP-1. HeLa cells were treated with Mock, rVpr

(10pg), Dex (1µM), Mifpristone (1µM), rVpr (10pg)+Mifpristone (1µM), or Vpr (10pg)+anti-Vpr(1:200) and nuclear/cytoplasmic contents were measured for PARP-1. (c) High concentration of Dex is sufficient to reverse Vpr's effects on PARP-1 nuclear localization. Total nuclear and cytosol extracts were prepared from rVpr (10pg) or rVpr+Dex treated cells at indicate concentrations post 30 hours treatment. Nuclear/Cytoplasmic extracts were blotted for PARP-1 and Tom20/PCNA as a fractionation control.

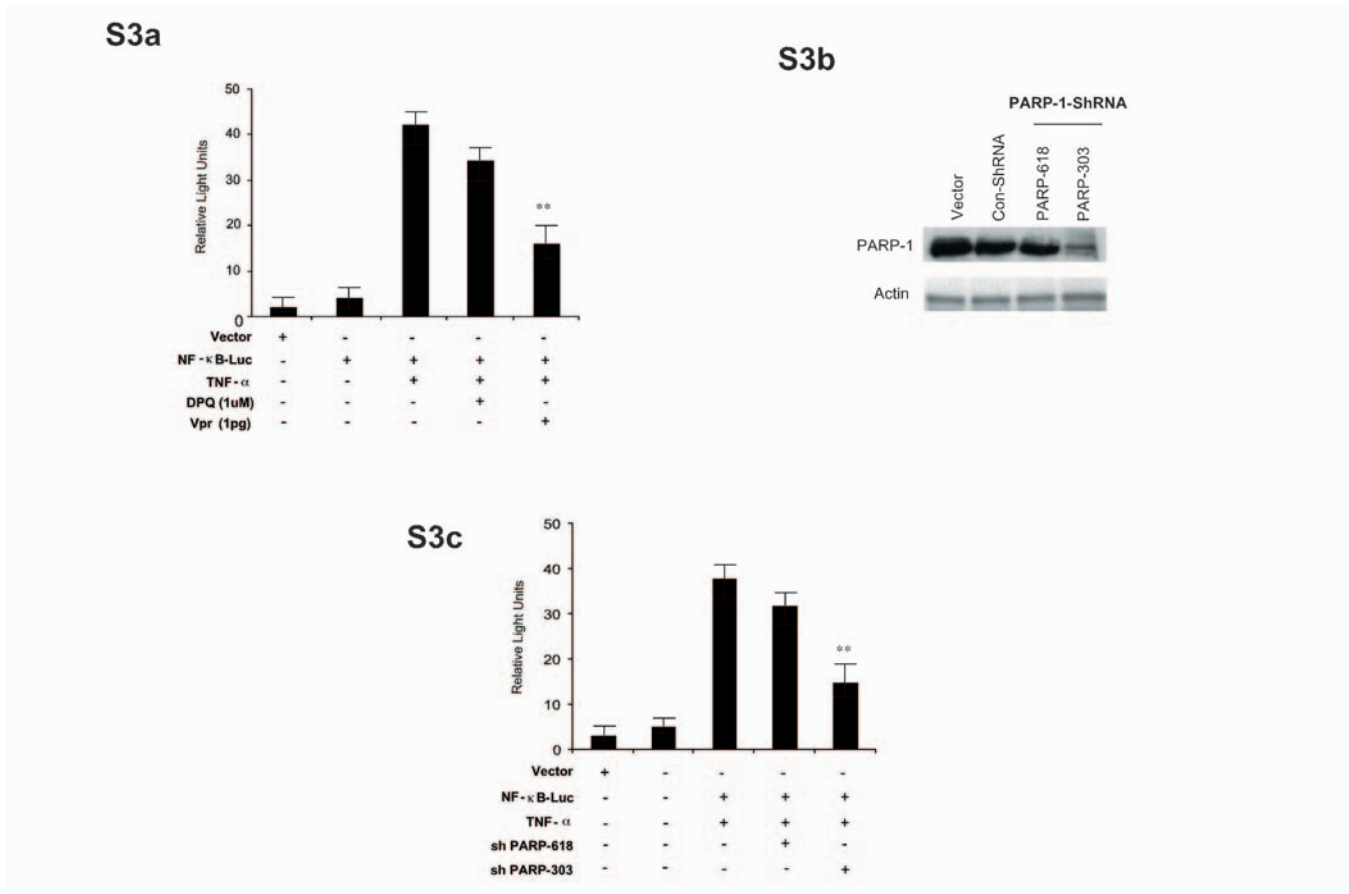

**Figure S3** PARP-1 but not its enzymatic activity is required for NF-κB transcription. (a) Vpr-mediated NF-κB suppression is not associated with the enzymatic functions of PARP-1. HeLa cells were transfected with the NF-κB dependent reporter plasmid (2μg), with pCMVLacZ (1μg) and treated with or without rVpr (10pg) or DPQ (1μM) and luciferase was measured as described in Methods. An asterisk (\*\*) over a bar indicates a statistically significant lower ratio of the experimental compared with the control (p<0.005). (b) shRNA mediated depletion of PARP-1. HeLa were transfected

with 5μg of siRNA control vector or PARP-1 shRNA expression constructs as indicated clones. Cell lysates were extracted 48hrs post-transfection and immunoblotting was performed by using an anti-PARP-1 antibody and an actin antibody as a control for equal loading. (c) Luciferase assay measuring NF-κB activation with shRNA directed against PARP-1 from (a) is shown. An asterisk (\*\*) over a bar indicates a statistically significant lower ratio of the experimental compared with the control (p<0.05).
